1 **TITLE:** T cell responses to nonstructural protein 3 distinguish infections by Dengue and  
2 Zika viruses

3

4 **AUTHORS:** Bobby Brooke Herrera<sup>1\*</sup>, Wen-Yang Tsai<sup>2\*</sup>, Carlos Brites<sup>3</sup>, Estela Luz<sup>3</sup>,  
5 Celia Pedrosa<sup>3</sup>, Jan Felix Drexler<sup>4,5</sup>, Wei-Kung Wang<sup>2†</sup>, Phyllis J. Kanki<sup>1†</sup>

6

7 **AFFILIATIONS:** <sup>1</sup>Department of Immunology and Infectious Diseases, Harvard T.H.  
8 Chan School of Public Health, Boston, MA, USA

9 <sup>2</sup>Department of Tropical Medicine, Medical Microbiology and Pharmacology, John A.  
10 Burns School of Medicine, University of Hawaii at Manoa, Honolulu, HI, USA

11 <sup>3</sup>Laboratory of Infection Research, School of Medicine, Federal University of Bahia,  
12 Salvador, Brazil

13 <sup>4</sup>Charité-Universitätsmedizin Berlin, corporate member of Freie Universität Berlin,  
14 Humboldt-Universität zu Berlin, and Berlin Institute of Health, Institute of Virology,  
15 Germany

16 <sup>5</sup>German Centre for Infection Research, Germany

17

18 \*These authors contributed equally to this work.

19

20 †Corresponding authors: Email: [pkanki@hsph.harvard.edu](mailto:pkanki@hsph.harvard.edu) (PJK); [wkwang@hawaii.edu](mailto:wkwang@hawaii.edu)  
21 (WKW)

22

23 **RUNNING TITLE:** T cell responses distinguish flavivirus infections

24 **ABSTRACT WORD COUNT: 229**

25

26 **TEXT WORD COUNT: 3,409**

27

28 **KEYWORDS:** Zika virus, dengue virus, T cell responses, nonstructural protein 3, Brazil

29

30

31

32

33

34

35

36

37

38

39

40

41

42

43

44

45

46

47 **ABSTRACT**

48

49           The 2015-16 Zika virus (ZIKV) epidemic in the Americas and the Caribbean  
50 demonstrates that clinical assays to detect, distinguish, and characterize immune  
51 responses to flaviviral infections are needed. ZIKV and dengue virus (DENV) are  
52 mosquito-transmitted flaviviruses sharing overlapping geographical distribution and  
53 have significant sequence similarity that can increase the potential for antibody and T  
54 cell cross-reaction. Using nonstructural protein 1-based enzyme-linked immunosorbent  
55 assays (ELISAs), we determine the serostatus of individuals living in a DENV- and  
56 ZIKV-endemic region in Brazil, identifying individuals with primary DENV (pDENV) and  
57 ZIKV (pZIKV), ZIKV with primary DENV (ZIKVwpDENV), and secondary DENV  
58 (sDENV) infections; pDENV and pZIKV were further confirmed by neutralization tests.  
59 Development of an enzyme-linked immunospot (ELISPOT) assay for DENV and ZIKV  
60 structural and nonstructural (NS) protein antigens enables us to distinguish infections by  
61 these viruses based on T cells and to characterize those responses. We find that IFN- $\gamma$   
62 and TNF- $\alpha$  T cell responses to NS3 differentiates DENV and ZIKV infections with 94%  
63 sensitivity and 92% specificity. In general, we also show that pDENV and sDENV cases  
64 and pZIKV and ZIKVwpDENV cases elicit similar T cell response patterns, and that HIV-  
65 infected individuals have T cell responses that are lower in magnitude compared to HIV-  
66 negative individuals. These results have important implications for DENV and ZIKV  
67 diagnostic and vaccine development and provide critical insights into the T cell  
68 response in individuals with multiple flaviviral infections.

69

70 **IMPORTANCE**

71

72           The potential for antibody and T cell cross-reaction to DENV and ZIKV,  
73 flaviviruses that co-circulate and can sequentially infect individuals, has complicated  
74 diagnostic and vaccine development. Our serological data show that antibodies to  
75 nonstructural protein 1 can distinguish sequential human infections by DENV and ZIKV.  
76 The development of a simple and inexpensive assay also enables the differentiation of  
77 DENV and ZIKV infections based on the characterization of T cell responses. Our T cell  
78 data reveals strong response patterns that are similar in nature in individuals with one or  
79 multiple DENV infections and in individuals with only primary ZIKV infection and ZIKV-  
80 infected individuals with previous DENV exposure. The characterization of T cell  
81 responses in a serologically-validated group of individuals is of relevance to the  
82 development of vaccines and immunotherapeutics against these global threats.

83

84

85

86

87

88

89

90

91

92

93 **INTRODUCTION**

94

95 *Aedes* mosquitoes transmit globally relevant flaviviruses including dengue virus  
96 (DENV) and Zika virus (ZIKV). DENV exists as four antigenic serotypes, DENV1 to  
97 DENV4 (1). These viruses have a wide geographic distribution with approximately 390  
98 million infections annually and more than a quarter of the world's population at risk (2).  
99 Prior to 2015, ZIKV was considered obscure and known to circulate in Africa and  
100 Southeast Asia as two separate viral lineages, African and Asian (3). While most  
101 asymptomatic, the clinical presentation of ZIKV infection resembles that of dengue  
102 including fever, rash, conjunctivitis, arthralgia, and myalgia (4). In early 2015, thousands  
103 of Asian ZIKV cases appeared in northeast Brazil, with accompanying reports of severe  
104 neuropathology including congenital microcephaly and Guillain-Barré syndrome (5, 6).  
105 In February 2016, the World Health Organization declared ZIKV a public health  
106 emergency of international concern (7). By June 2016, autochthonous transmission of  
107 ZIKV had been reported in 40 countries and territories throughout South and Central  
108 America and the Caribbean (8).

109 The emergence of ZIKV in DENV-endemic regions is of particular concern and  
110 relevant for diagnostic and vaccine development. The cocirculation of these genetically  
111 similar viruses can result in co-infection or sequential exposure, which has been shown  
112 to potentiate cross-reactive immunity at both the antibody and T cell levels (9-12). The  
113 envelope (E) protein is the major target of the antibody response in humans during  
114 flaviviral infection (1). Antibody-based assays were found to detect extensive cross-  
115 reactivity to ZIKV E protein with other flaviviruses, requiring confirmation by plaque

116 reduction neutralization tests (PRNTs) (11, 13-16). These tests, however, are  
117 challenged in their ability to confirm infection in individuals with multiple flaviviral  
118 infections especially during the acute and early convalescent phases. Several studies  
119 have also shown that most dengue-immune sera or DENV E monoclonal antibodies  
120 cross-react to ZIKV, but contain limited cross-neutralization activity and can instead  
121 enhance ZIKV infection, known as antibody-dependent enhancement (ADE) (17-22). In  
122 contrast, recent studies reported antibodies to ZIKV nonstructural protein 1 (NS1) were  
123 able to discriminate infections by these viruses (23, 24). We previously showed that  
124 combinations of DENV and ZIKV NS1-based enzyme-linked immunosorbent assays  
125 (ELISAs) were capable of distinguishing confirmed cases with past and present flaviviral  
126 infections including primary DENV (pDENV) and ZIKV (pZIKV), ZIKV with primary  
127 DENV (ZIKVwpDENV), and secondary DENV (sDENV) infections (12). These ELISAs  
128 are applicable for routine serological tests for DENV and ZIKV as well useful in  
129 retrospective studies to identify individuals with primary and multiple flaviviral infections.

130         Pre-existing T cell responses to DENV have also been shown to react to  
131 peptides encoded throughout the ZIKV proteome. DENV-naïve mice challenged with  
132 ZIKV developed ZIKV-specific CD8<sup>+</sup> T cells, whereas DENV-immune mice challenged  
133 with ZIKV elicited cross-reactive CD8<sup>+</sup> T cells that reduced infectious ZIKV (25). A study  
134 in humans infected with Asian ZIKV demonstrated that DENV serostatus influences the  
135 T cell response to ZIKV (10). DENV-immune individuals elicited CD4<sup>+</sup> and CD8<sup>+</sup> T cell  
136 responses to ZIKV more rapidly and of greater magnitude compared to DENV-naïve  
137 ZIKV-infected individuals. In addition, different patterns of immunodominant T cell  
138 responses were observed in the case of DENV and ZIKV infections. While CD8<sup>+</sup> T cell

139 responses against DENV target nonstructural (NS) proteins such as NS3, NS4B, and  
140 NS5, ZIKV-specific CD8<sup>+</sup> T cell responses target the structural proteins, capsid (C),  
141 premembrane (prM), and E (10, 26). We previously developed a modified anthrax toxin  
142 (LFn)-based enzyme-linked immunospot (ELISPOT) assay, which revealed long-term T  
143 cell responses that were ZIKV- and DENV-specific to NS3 protease but cross-reactive  
144 to NS3 helicase in individuals infected with DENV and African ZIKV (27). The impact of  
145 cross-reactive immune responses in protection or development of ZIKV-mediated  
146 neuropathology remains unclear.

147 In this study, we utilized our NS1-based ELISAs to determine the DENV and  
148 ZIKV serostatus of individuals from Salvador, Brazil, a DENV-hyperendemic region with  
149 one of the highest incidence rates of ZIKV during the 2015-16 epidemic (28). We then  
150 tested the ability of our LFn ELISPOT assay to distinguish infections by DENV and  
151 Asian ZIKV based on T cells and to characterize those responses.

152

## 153 **RESULTS**

154

### 155 **NS1-based ELISAs and neutralization test determine DENV and ZIKV serostatus**

156

157 During the ZIKV outbreak in Salvador, Brazil, acute-phase blood samples were  
158 collected from hundreds of suspected ZIKV-infected patients attending HIV outpatient  
159 clinics between November 2015 and May 2016. Serological testing for ZIKV-NS1 IgG  
160 and DENV-E IgG was performed, revealing a high incidence of ZIKV infection in  
161 presumed DENV-immune and -naïve individuals (28). Fifty of these patients were

162 included in the present study. Their median age was 43 (range: 23-72), 49% female,  
163 and 76% were human immunodeficiency virus (HIV)-infected. All HIV-infected  
164 individuals were on antiretroviral therapy; more than 92% had undetectable viral loads  
165 and normal CD4 counts. Patient characteristics and acute serology data are  
166 summarized in Table S1 and Table 1, respectively.

167 In order to determine the DENV and ZIKV serostatus among the study  
168 participants who had potentially been dual exposed, we collected late convalescent-  
169 phase blood samples and employed our previously developed ZIKV-NS1 and DENV-  
170 NS1 IgG ELISAs (22). For samples positive for DENV-NS1, we calculated the ratio of  
171 relative optical density (rOD) of ZIKV-NS1 to that of DENV-NS1 and used the rOD ratio  
172  $< \text{or } \geq 0.24$  to determine sDENV or ZIKVwpDENV infection, respectively (22). Twelve  
173 ZIKVwpDENV and 21 sDENV infections were identified (Table 1, Fig. 1A to C). Five  
174 samples with ZIKV-NS1 positive and DENV-NS1 negative were pZIKV. Since these  
175 samples were collected more than one year post-infection, some anti-NS1 antibodies  
176 may have declined to levels below detection, we further tested with ZIKV and DENV E  
177 protein-based ELISAs and identified four samples negative for both ZIKV and DENV in  
178 all four ELISAs tested (Table 1). Based on the difference in rOD of ZIKV and DENV E  
179 proteins ( $\Delta\text{rOD} = \text{rOD of ZIKV} - \text{rOD of DENV}$ ), we identified four pZIKV ( $\Delta\text{rOD} \geq 0.17$ )  
180 and four pDENV ( $\Delta\text{rOD} < -0.17$ ) infections (Table 1, Fig. 1D to E). The negative, pZIKV  
181 and, pDENV samples were further confirmed by micro-neutralization tests to DENV1-4  
182 and ZIKV; all four negative samples had  $\text{NT}_{90}$  titers  $< 10$  to DENV1-4 and ZIKV, and the  
183 five pZIKV and four pDENV samples showed monotypic neutralization pattern to ZIKV  
184 and to one of the four DENV serotypes, respectively (Table 1). For the remaining 33



185 samples, microneutralization tests to ZIKV, DENV1 and/or DENV2 or 3 were performed  
186 to show that all 12 ZIKVwpDENV samples neutralize ( $NT_{90}$  titers  $\geq 10$ ) ZIKV plus at least  
187 one DENV serotype, whereas all 21 sDENV samples neutralize at least two DENV  
188 serotypes or DENV plus ZIKV; these patterns were compatible with unspecified  
189 flavivirus infection according to CDC guidelines (16). An additional three samples  
190 (ZK1004, 1005, 1008), which had  $\Delta rOD$  between  $-0.17$  and  $0.17$ , positive ZIKV-NS1  
191 IgG at acute-phase sera but negative at late convalescent-phase, were classified as  
192 undetermined (Table 1). Another sample (ZK0981), for which DENV acute-phase  
193 serology was not performed, was negative for ELISAs using late convalescent-phase  
194 serum and was also classified as undetermined.

195

### 196 **T cell responses to NS3 distinguish DENV and ZIKV infections**

197

198 We recently reported the development of a LFn ELISPOT assay based on NS3  
199 protease and helicase to distinguish DENV and African ZIKV human infections (27). To  
200 assess the ability of the assay to distinguish infection by DENV and Asian ZIKV, we  
201 performed DENV and ZIKV homologous and heterologous LFn-NS3 protease and  
202 helicase stimulation of date-matched late convalescent-phase PBMCs in an IFN- $\gamma$  and  
203 TNF- $\alpha$  ELISPOT among the serological-validated pDENV, pZIKV, sDENV, and  
204 ZIKVwpDENV, and undetermined cases. Using a NS3 protease to helicase ratio cutoff  
205 of 1.05 for the IFN- $\gamma$  ELISPOT, pDENV and sDENV cases and pZIKV, ZIKVwpDENV  
206 and the 3 out of the 4 serologically undetermined cases appeared to group together  
207 (Fig. 2A). From the undetermined cases, 3 out of 4 (ZK1004, 1005, 1008) grouped with

208 the ZIKV-exposed individuals, while ZK0981 grouped with the DENV-infected  
209 individuals. Using a ratio cutoff of 1.048 for the TNF- $\alpha$  ELISPOT, similar groupings were  
210 observed (Fig. 2B). We were unable to distinguish sequential infections based on T cell  
211 responses to NS3 protease and helicase.

212 Test data were further analyzed to define sensitivity (identifying true positives;  
213 individuals who had been infected by DENV versus ZIKV) and specificity (true  
214 negatives; DENV- or ZIKV-uninfected individuals). We evaluated sensitivity and  
215 specificity as functions of the IFN- $\gamma$  and TNF- $\alpha$  cutoff values, above which a sample was  
216 considered positive and below which a sample was considered negative. We grouped  
217 pDENV and sDENV and pZIKV and ZIKVwpDENV cases together based on the  
218 clustering observed and excluded the 4 serologically undetermined cases from the  
219 analysis. Receiver Operating Characteristic (ROC) curves and corresponding numerical  
220 values illustrate the performance of the ELISPOTs as a function of the discrimination  
221 threshold, plotted as sensitivity versus 1 – specificity. The areas of the ROC curves  
222 represent test performance, where 1 represents a perfect test, and 0.5 represents a  
223 random predictor. We measured areas of 0.96 and 0.97 for the IFN- $\gamma$  and TNF- $\alpha$   
224 ELISPOTs, respectively (Table 2, Fig. 2 C-D). Using the cutoff values, the test  
225 sensitivity and specificity for both the IFN- $\gamma$  and TNF- $\alpha$  ELISPOTs were 94% and 92%,  
226 respectively.

227

228 **LFn-DENV and -ZIKV structural and nonstructural proteins elicit robust T cell**  
229 **responses and prior DENV exposure does not affect the response**

230

231 To assess the magnitude of T cell responses among the study participants, we  
232 stimulated late convalescent-phase PBMCs in IFN- $\gamma$  and TNF- $\alpha$  ELISPOTs using the  
233 following six LFn fusion proteins: LFn-DENV-NS3-Protease (LFn-DV NS3-P), LFn-  
234 DENV-NS3-Helicase (LFn-DV NS3-H), LFn-ZIKV-Capsid (LFn-ZV C), LFn-ZIKV-  
235 premembrane (LFn-ZV prM), LFn-ZIKV-NS3-Protease (LFn-ZV NS3-P), LFn-ZIKV-  
236 NS3-Helicase (LFn-ZV NS3-H). Individuals with pDENV and sDENV infections elicited  
237 similar IFN- $\gamma$  and TNF- $\alpha$  T cell response patterns (Fig. 3 A-B). These individuals had T  
238 cell responses to LFn-DV NS3-H and LFn-ZV NS3-H that were stronger in magnitude  
239 than to LFn-DV NS3-P and LFn-ZV NS3-P, respectively. Additionally, T cell responses  
240 to LFn-DV NS3-P and NS3-H were stronger compared to LFn-ZV NS3-P and NS3-H.  
241 The amount of T cell cross-reaction to the ZIKV structural proteins (LFn-ZV C and LFn-  
242 ZV prM) was limited, compared to high cross-reactivity to LFn-ZV NS3-P and NS3-H.  
243 Furthermore, individuals with pZIKV and ZIKVwpDENV infections elicited T cell  
244 responses to LFn-ZV NS3-H and LFn-DV NS3-H that were stronger in magnitude  
245 compared to LFn-ZV NS3-P and LFn-DV NS3-P, respectively (Fig. 3 C-D). While  
246 individuals with pZIKV and ZIKVwpDENV infections had stronger IFN- $\gamma$  T cell responses  
247 to LFn-ZV NS3-H than to the ZIKV structural proteins, TNF- $\alpha$  responses to the ZIKV  
248 structural proteins were stronger than to LFn-ZV NS3-P.

249 We further evaluated the impact of DENV immunity on the magnitude of T cell  
250 responses. We compared the magnitude of the IFN- $\gamma$  and TNF- $\alpha$  T cell responses  
251 between individuals with pDENV and sDENV infections and pZIKV and ZIKVwpDENV  
252 infections. In all cases, T cell responses in individuals with prior DENV exposure were  
253 not significantly higher compared to individuals with a primary DENV or ZIKV infection

254 (Fig. 3 A-D). While IFN- $\gamma$  and TNF- $\alpha$  responses appeared stronger to the ZIKV  
255 structural proteins in individuals with sDENV infections than to individuals with pDENV  
256 infections, these differences were not statistically significant. Similarly, individuals with  
257 ZIKVwpDENV infection had comparable IFN- $\gamma$  and TNF- $\alpha$  T responses to those with  
258 pZIKV infections (Fig. 3 C-D).

259

### 260 **HIV influences the T cell response in DENV-exposed individuals**

261

262 We also compared the magnitude of the IFN- $\gamma$  and TNF- $\alpha$  T cell responses in  
263 DENV-exposed (grouping individuals with pDENV and sDENV infections together),  
264 pZIKV, and ZIKVwpDENV individuals who were HIV-negative or HIV-infected. DENV-  
265 exposed HIV-negative individuals had stronger IFN- $\gamma$  responses to LFn-ZV C, -ZV NS3-  
266 P, and -ZV NS3-H compared to HIV-infected individuals. IFN- $\gamma$  responses to LFn-DV  
267 NS3-P and NS3-H appeared to be stronger in the HIV-infected individuals, although  
268 these differences were not statistically significant ( $p=0.61$  and  $p=0.13$ , respectively)  
269 (Fig. 4 A). A similar pattern of responses was observed for TNF- $\alpha$  (Fig. 4 D). In general,  
270 ZIKVwpDENV HIV-negative individuals had stronger IFN- $\gamma$  and TNF- $\alpha$  responses  
271 compared to individuals that were HIV-infected (Fig. 4 B and E). In contrast, there was  
272 largely no difference in the IFN- $\gamma$  and TNF- $\alpha$  responses in pZIKV HIV-negative and HIV-  
273 infected individuals (Fig. 4 C and F). There was an exception where the TNF- $\alpha$   
274 response to LFn-ZV NS3-H was stronger in individuals that were HIV-negative.

275

276

## 277 **DISCUSSION**

278

279           We report on the characterization of late convalescent-phase antibody and T cell  
280 responses in individuals from Salvador, Brazil, a DENV-hyperendemic region that was  
281 burdened by the 2015-2016 ZIKV outbreak. Our study presents three major findings in a  
282 serologically-validated group of DENV and/or ZIKV infected individuals. First, IFN- $\gamma$  and  
283 TNF- $\alpha$  T cell response ratios of ZIKV NS3 protease to DENV NS3 protease can  
284 discriminate infections in individuals exposed to these viruses. Second, individuals with  
285 pDENV and sDENV infections have similar T cell response patterns, with extensive  
286 cross-reactivity to ZIKV NS3 helicase, whereas individuals with pZIKV and  
287 ZIKVwpDENV infections have strong responses to both ZIKV structural and  
288 nonstructural proteins, with high cross-reaction to DENV NS3 helicase. Third, HIV-  
289 infection is associated with responses that are lower in magnitude in DENV exposed  
290 individuals.

291           Our previous study of NS1-based ELISAs on convalescent-phase sera from RT-  
292 PCR confirmed cases with pZIKV, pDENV, sDENV and ZIKVwpDENV infections  
293 showed that sDENV infection panel cross-react to ZIKV-NS1 and the rOD ratio of ZIKV-  
294 NS1 to DENV-NS1 in IgG ELISA can distinguish sDENV and ZIKVwpDENV infections  
295 (22). Since anti-NS1 antibodies may decline over time and become undetectable  
296 especially for those with primary infection, we further tested these samples with E  
297 protein-based IgG ELISAs and identified four negative samples, five pZIKV and four  
298 pDENV infections. All these 13 samples have been verified by neutralization test using  
299 NT<sub>90</sub>  $\geq 10$  as cutoff based on the CDC guidelines (16), suggesting that  $\Delta$ rOD based on

300 ZIKV-E and DENV-E IgG ELISAs can distinguish pZIKV and pDENV infections; this  
301 could potentially be a useful tool for epidemiology and pathogenesis study in endemic  
302 regions. However, the sample size is small and the  $\Delta$ rOD of 0.17 was based on a single  
303 serum dilution of 1:800, future studies involving larger sample size and different  
304 dilutions or end-point titers are needed to further validate these observations.

305         The degree of amino acid sequence identity between DENV and ZIKV structural  
306 and nonstructural proteins is 49% and 51%, respectively (10). Multiple sequence  
307 alignment and homology determination of DENV and ZIKV NS3 demonstrates high  
308 amino acid sequence identity of 67%, with protease and helicase homology of 58% and  
309 72%, respectively, consistent with the higher degree of DENV/ZIKV cross-reaction in  
310 NS3 helicase (Table 3, Fig. 5). Our recent characterization of acute- and convalescent-  
311 phase T cells collected from individuals infected with DENV and African ZIKV in  
312 Senegal, West Africa, revealed sustained DENV- and ZIKV-specific responses to NS3  
313 protease and cross-reactive responses to NS3 helicase (27). Our findings in individuals  
314 infected with DENV and Asian ZIKV are in agreement with our previous observations.  
315 Although we were unable to distinguish sequential exposure, the LFn NS3 protease  
316 ELISPOT differentiates infections between DENV- and ZIKV-infected individuals with  
317 high sensitivity and specificity of 94% and 92%, respectively.

318         A relatively large body of epidemiological and laboratory-based evidence has  
319 suggested that severe and often fatal forms of dengue disease occurs most commonly  
320 during a secondary infection by a heterotypic DENV serotype (29, 30). Another  
321 phenomenon, known as original antigenic sin (OAS), has been observed in antibody as  
322 well as T-cell responses, in which less-effective T cells generated in response to a

323 primary DENV infection predominate during a subsequent infection with a different  
324 DENV serotype, resulting in an inappropriate response and predisposing individuals to  
325 severe disease (31, 32). The OAS hypothesis was challenged by a study in Sri Lankan  
326 individuals infected with DENV, which showed that the phenomenon does not generate  
327 less functional responses, but instead correlates with protective responses to conserved  
328 viral sequences (26). Unexpectedly, we did not observe T cell responses that were  
329 significantly higher in magnitude in individuals with prior DENV exposure. These results  
330 are in contrast to our data on African ZIKV infections, which showed that previous  
331 flavivirus exposure was associated with enhanced T cell responses (27). One possibility  
332 is that the proportion of HIV infection among those with prior DENV exposure was  
333 higher compared with DENV-naïve in this study (90.5% versus 50% comparing sDENV  
334 and pDENV cases; 83.3% versus 60% comparing ZIKVwpDENV and pZIKV cases).  
335 Nevertheless, as co-circulation of DENV, ZIKV, and other flaviviruses occurs throughout  
336 many parts of the world, it is critical to continue to develop tools to better understand T  
337 cell immunity in individuals exposed to multiple flaviviruses.

338           A recent study using human leukocyte antigen (HLA) transgenic mice infected  
339 with DENV2 and Asian and African ZIKV strains revealed cross-reactive T cell  
340 responses to HLA-restricted epitopes (25). Out of 8 ZIKV NS3 epitopes computationally  
341 predicted to bind HLA class I molecules, only 3 epitopes elicited DENV2/Asian ZIKV  
342 cross-reactive T cell responses. Of note, the cross-reactive epitopes were all positioned  
343 within the helicase domain of NS3, further supporting our observations of high  
344 DENV/ZIKV NS3 helicase T cell cross-reaction. Another study demonstrated ZIKV-  
345 specific and ZIKV/DENV cross-reactive T cell responses in humans (10). T cell

346 responses generated in response to prior DENV exposure recognized peptides  
347 sequences located throughout the ZIKV proteome. DENV serostatus also influenced T  
348 cell immunity to ZIKV. DENV-naïve ZIKV-positive individuals had predominant CD8 T  
349 cell responses directed against structural proteins. In contrast, a majority of CD8 T cells  
350 responses were directed against nonstructural proteins in DENV-immune ZIKV-positive  
351 individuals, suggesting that previous DENV exposure can alter the T cell response.

352 While the above studies used peptide stimulation to characterize the T cell  
353 response, there are concerns around this approach (33). Some of the HLA-predicted  
354 peptides may fail to stimulate strong T cell responses as expected. Longer and shorter  
355 peptides have also been shown to elicit different types of responses (34-36). An  
356 alternative to peptide stimulation is the anthrax LFn, which has the capability to deliver  
357 full length antigen into the cytosol for native processing via the MHC pathways, and to  
358 elicit better T cell responses compared to peptides in some cases (37-42). Our  
359 adaptation of the LFn ELISPOT, not only allowed detection of human DENV and ZIKV  
360 infections, but also characterization of the associated T cell responses to structural and  
361 nonstructural proteins. We demonstrated that individuals with pDENV and sDENV  
362 infections had similar IFN- $\gamma$  and TNF- $\alpha$  T cell response patterns with high cross-  
363 reactivity to ZIKV NS3 helicase, but low cross-reactivity to the ZIKV structural proteins.  
364 A small number of individuals with sDENV infections had cross-reactive T cell  
365 responses to ZIKV structural proteins. Interestingly, however, individuals with pZIKV  
366 and ZIKVwpDENV infections had similar IFN- $\gamma$  and TNF- $\alpha$  T cell responses patterns,  
367 with strong responses to structural and nonstructural proteins. It is noteworthy that we  
368 observed comparably strong T cell responses to the structural proteins in pZIKV and



369 ZIKVwpDENV cases, in contrast to Grifoni et al., suggesting that the most recent  
370 infection may dictate the T cell response (10). Another possibility that cannot be  
371 excluded is the differences in T cell stimulation strategies, which may be contributing to  
372 the observed differences. Additionally, due to the limited collection of blood samples  
373 from each patient, we were unable to characterize CD4- and CD8-specific responses.  
374 Future characterization studies using the LFn delivery system on CD4 and CD8 T cells  
375 will be important.

376         Our study of ZIKV seroprevalence in West Africa demonstrated continued human  
377 transmission of the virus in HIV- and malaria-infected individuals (43). The co-infection  
378 of flaviviruses with HIV or malaria could potentially impact pathophysiological  
379 mechanisms, induce different clinical and laboratory findings, and interfere with  
380 treatment. Previous studies have shown a suppression of HIV-1 replication during acute  
381 DENV infection (44, 45). In this study, we demonstrated that DENV-exposed individuals  
382 who are HIV-infected had T cell responses that were significantly lower in magnitude  
383 compared to HIV-negative individuals except in individuals with pZIKV infections. We  
384 also observed that DENV-exposed HIV-infected individuals have T cell responses that  
385 were lower in magnitude to ZIKV proteins compared to DENV-exposed HIV-negative  
386 individuals. Whether HIV infection in DENV-exposed individuals reduces the ability to  
387 induce cross-reactive T cell responses has important implications. More studies with  
388 larger sample sizes are needed to increase our limited understanding of the  
389 epidemiological and immunopathogenesis interactions of flavivirus exposure in  
390 individuals with HIV and other comorbidities.

391 In summary, despite high sequence homology between DENV and ZIKV,  
392 diagnostic assays based on antibodies to NS1 and T cell responses to NS3 protease  
393 are effective at distinguishing human infections by these viruses. The LFn ELISPOT  
394 assay has enabled direct comparison of T cell characterization in DENV, Asian and  
395 Africa ZIKV human infections. As vaccines against DENV and ZIKV are currently being  
396 developed, the information generated from these characterization studies are of high  
397 relevance. The results of these characterization studies may contribute to the design  
398 and development of DENV and ZIKV vaccines and T cell based diagnostics.

399

## 400 **MATERIALS AND METHODS**

401

### 402 **Clinical samples and ethical statement**

403

404 Fifty late convalescent-phase blood samples were obtained from patients at  
405 Professor Edgard Santos University Hospital, Federal University of Bahia, Salvador,  
406 Brazil. These individuals were suspected ZIKV-infected during the 2015-2016 ZIKV  
407 epidemic and their acute-phase sera were screened for ZIKV and DENV antibodies.  
408 Late convalescent-phase peripheral blood mononuclear cells (PBMCs) were separated  
409 from whole blood in EDTA tubes by Ficoll-Hypaque gradient density (Sigma-Aldrich, St.  
410 Louis, MO, USA) and cryopreserved in freezing media (10% dimethyl sulfoxide [DMSO],  
411 Sigma-Aldrich, St. Louis, MO, USA) at -80°C overnight prior to transfer to liquid  
412 nitrogen. Convalescent-phase serum was aliquoted and immediately transferred to -  
413 80°C.

414 The Federal University of Bahia Institutional Review Board (IRB), the Harvard  
415 T.H. Chan School of Public Health IRB, and the University of Hawaii IRB approved the  
416 primary studies under which the samples and data were collected. All patients provided  
417 informed consent for the collection of samples. Excess samples and corresponding data  
418 were banked, coded prior to analyses, and stored at the Federal University of Bahia.

419

## 420 **ELISAs**

421

422 For acute-phase sera, commercial ZIKV-NS1 and DENV-E based IgG ELISAs  
423 (Euroimmun, Luebeck, Germany) were performed (27). For late convalescent-phase  
424 sera, ZIKV- and DENV1-NS1 IgG ELISAs were performed as described previously (22). Briefly,  
425 purified NS1 proteins (16 ng per well) were coated onto 96-well plates overnight, followed by  
426 blocking and incubation with primary (serum at 1:400 dilution) and secondary (anti-  
427 human IgG conjugated with HRP, Jackson) antibodies (22). The OD at 450 nm was  
428 read with a reference wavelength of 650 nm. Each ELISA plate included two positives  
429 (two confirmed-Zika or confirmed-dengue samples for ZIKV- and DENV-NS1 ELISAs,  
430 respectively), four negatives (4 flavivirus-naïve sera), and tested samples (all in  
431 duplicates). The OD values were divided by the mean OD value of positive controls to  
432 calculate the rOD values. The cut-off was defined by the mean rOD value of negatives  
433 plus 12 standard deviations as described previously (22). For samples positive for both  
434 ZIKV- and DENV-NS1 ELISAs, the ratio of rOD ( $=\text{rOD of ZIKV-NS1}/\text{rOD of DENV-NS1}$ )  
435 was calculated; rOD ratio  $<$  or  $\geq$  0.24 indicated sDENV or ZIKVwpDENV infection,  
436 respectively (22).

437 E protein-based IgG ELISAs using DENV1 virion or ZIKV (MR766 strain) virus  
438 like particles (VLP) were also tested for late convalescent-phase sera (46). Briefly,  
439 DENV1 virions or ZIKV-VLP derived from ultracentrifugation of culture supernatants of  
440 virus-infected Vero cells or pENTR-ZIKV prME plasmid-transfected 293T cells,  
441 respectively, were UV inactivated (for virions) and coated on 96-well plates at 4°C  
442 overnight, followed by blocking and incubation with primary (serum at 1:800 dilution)  
443 and secondary antibodies as above. The rOD and cut-off rOD values were similarly  
444 calculated. The difference in rOD of ZIKV and DENV E proteins ( $\Delta rOD = rOD \text{ of ZIKV} -$   
445  $rOD \text{ of DENV}$ ) was determined;  $\Delta rOD \geq 0.17$  or  $< -0.17$  was classified as pZIKV or  
446 pDENV infection, respectively.

447

#### 448 **Neutralization test**

449

450 PRNT was performed on acute-phase sera to detect neutralization antibody to  
451 ZIKV as reported previously (47). For late convalescent-phase sera, a previously  
452 described micro-neutralization test was performed (48). Briefly, flat-bottom 96-well  
453 plates were seeded with Vero cells ( $3 \times 10^4$  cells per well) 24 h prior to infection. Four-  
454 fold serial dilutions of serum (starting from 1:10) were mixed with 50 focus-forming units  
455 of DENV1 (Hawaii strain), DENV2 (NGC strain), DENV3 (CH53489), DENV4 (H241  
456 strain) or ZIKV (PRVABC59 strain) at 37°C for 1 h. The mixtures were added to each  
457 well followed by incubation for 48 h (except 70 h for DENV1), removal of medium, and  
458 fixation as described previously (46). After adding murine mAb 4G2 and secondary  
459 antibody mixture (IRDye® 800CW-conjugated goat anti-mouse IgG at 1:10000 and

460 DRAQ5™ Fluorescent Probe at 1:10000), the signal (800 nm/700 nm fluorescence) was  
461 detected by Li Cor Odyssey classic (LiCor Biosciences) and analyzed by Image Studio  
462 software to determine percent neutralization at different concentrations and NT<sub>90</sub> as  
463 described previously (46, 48).

464

465

### 466 **LFn fusion protein design**

467

468           Commercially synthesized gene fragments encoding the NS3 protease and  
469 helicase of DENV2 and C, prM, and NS3 protease and helicase of Asian ZIKV and were  
470 cloned into the LFn expression vector (pET15bLFn). The pET15bLFn vector contains a  
471 T7 promoter, histidine tag (His<sub>6</sub>), and the terminal domain of the anthrax lethal factor  
472 (LFn; 255 amino acids). The pET15bLFn containing the coding sequences of the DENV  
473 and Asian ZIKV proteins were transformed into *E. coli* BLR (DE3) (Millipore, Medford,  
474 MA, USA). Selected clones were sequenced to verify the reading frame, and clones  
475 containing the correct sequence were used for protein expression.

476           The LFn-DENV and -ZIKV fusion proteins and the LFn control were expressed  
477 upon isopropylthiogalactoside ([IPTG], Sigma-Aldrich, St. Louis, MO, USA) induction in  
478 5L Luria broth containing carbenicillin and chloramphenicol for 2-4 hours. Cells were  
479 pelleted by centrifugation and resuspended in imidazole (1mM) binding buffer  
480 (Novagen, Madison, WI, USA) in the presence of a protease inhibitor cocktail (Thermo  
481 Fisher Scientific, Rockford, IL, USA). Cell pellets were sonicated, centrifuged at 4°C,  
482 and the supernatants were loaded in an equilibrated nickel-charged column for affinity

483 purification. The bound proteins were eluted in 100-200 mM imidazole, desalted with a  
484 Sephadex G-25M column (Sigma-Aldrich, St. Louis, MO, USA), and eluted in PBS  
485 (Sigma-Aldrich, St. Louis, MO, USA). The PBS-eluted proteins were passed through  
486 Detoxi-Gel (Thermo Fisher Scientific, Rockford, IL, USA). Protein concentrations were  
487 determined samples were stored at -80°C.

488

#### 489 **ELISPOT assay**

490

491 *Ex vivo* ELISPOTs were performed as previously described. Briefly, 96-well  
492 polyvinylidene difluoride (PVDF)-backed MultiScreen<sub>HTS</sub> (MSIP) microtiter plates  
493 (Millipore, Medford, MA, USA) were treated with 100ul of 90% ethanol for 30 seconds  
494 and washed 5 times with sterile PBS. Plates were coated with 100ul of capture  
495 antibodies (Abs) in PBS. Plates containing capture Abs were incubated overnight at  
496 4°C. Plates were then blocked with 1% bovine serum albumin ([BSA], Sigma-Aldrich, St.  
497 Louis, MO, USA) in PBS and washed 6 times with PBS. Cryopreserved PBMCs were  
498 thawed in R10 medium and incubated overnight at 37°C. PBMCs were washed 2 times  
499 with PBS and seeded at  $2 \times 10^5$  cells/well in a final volume of 100ul/well. LFn-DENV  
500 and -ZIKV proteins were added to each well. As a positive control, PBMCs were  
501 stimulated with phytohemagglutinin ([PHA], Sigma-Aldrich, St. Louis, MO, USA). As a  
502 negative control, wells received LFn. After incubation for 24-28 hours at 37°C in 5%  
503 CO<sub>2</sub>, the cells were discarded and plates were washed 3 times with PBS and 3 times  
504 with PBS with 0.05% Tween-20 ([PBST], Bio Rad Technologies, Hercules, CA, USA) to  
505 remove cells. The detection antibodies were added and plates were incubated overnight

506 at 4°C. Plates were then washed 6 times with PBST, then incubated for 2 hours at room  
507 temperature with mixtures containing the enzymatic conjugates. To develop spots,  
508 plates were washed 4 times with PBST, three times with PBS, and 1 time with water.  
509 Vector Blue substrate solution (Vector Laboratories, Burlingame, CA, USA) was added  
510 for 5-15 mins before rinsing with water and air-drying. Digitized images were analyzed  
511 for spots using CTL ImmunoSpot reader (Cellular Technology Limited, Cleveland, OH,  
512 USA). DENV and ZIKV spots were calculated by subtracting the mean of the negative  
513 control value from the mean value of the specific stimulation. Positive responses had to  
514 be greater than 4 times the mean background, 3 standard deviations above the  
515 background, and  $\geq 55$  spot-forming cells per (SFC)/ $10^6$  PBMCs.

516

## 517 **ROC analysis**

518

519 The ELISPOTs were validated using PBMCs from individuals that were  
520 confirmed DENV- and/or ZIKV-infected by ELISA and/or neutralization tests. DENV and  
521 ZIKV NS3 protease to helicase values were calculated, resulting in normalized test  
522 ratios (ZIKV NS3 protease divided by DENV NS3 protease) ranging from 0.15-2.95. On  
523 the basis of these data, we determined the optimal cutoffs between 0.15 and 2.95 by  
524 calculating the sensitivity (number of true positives divided by total confirmed positive  
525 values) and specificity (number of true negatives divided by the total confirmed  
526 negatives) at increasing 0.05 to the theoretical cutoffs. After calculating the sensitivity  
527 and specificity values, the optimal cutoffs were defined as the highest sum of sensitivity  
528 and specificity, such that the optimal cutoff values reflected the optimal sensitivity and

529 specificity. The optimal cutoffs obtained for the IFN- $\gamma$  and TNF- $\alpha$  was 1.05 and 1.048,  
530 respectively (Prism 7, GraphPad Software, San Diego, CA, USA).

531

### 532 **Multiple sequence alignment and percent homology analysis**

533

534 Multiple sequence alignment of DENV1-4 and ZIKV NS3 was performed using  
535 the Clustal Omega program (EMBL-EB, Cambridgeshire, UK). Averages of DENV and  
536 ZIKV NS3 protease and helicase proteins were calculated using the ExPASy  
537 Bioinformatics Resource Portal (Swiss Institute of Bioinformatics, Lausanne,  
538 Switzerland) and based on averages of the different homology values in the four DENV  
539 serotypes and ZIKV. Average conservation was determined on a per-residue basis for  
540 NS3 protease, helicase, and full-length protein.

541

### 542 **Statistical analysis**

543

544 Statistical analysis was performed using Prism 7 (GraphPad Software, San  
545 Diego, CA, USA). Where appropriate, data were expressed as geometric positive  
546 means on box whisker and bar graphs  $\pm$  standard deviation. Data comparisons were  
547 conducted using the Wilcoxon rank sum test. A threshold of  $p < 0.05$  was considered  
548 statistically significant.

549

550

551



552 **Data Availability**

553

554 All relevant data has been included in the manuscript. We will provide any  
555 additional data upon request.

556

557 **ACKNOWLEDGEMENTS**

558

559 We thank Yichen Lu for providing us with the LFn expression vector and Gwong-Jen J.  
560 Chang at the CDC Fort Collins for providing us the pENTR-ZIKV prME plasmid. This  
561 work was funded by a Harvard University David Rockefeller Center for Latin American  
562 Studies grant to BBH, and by grants R01AI110769-01 from the National Institute of  
563 Allergy and Infectious Diseases and P20GM103516 from the National Institute of  
564 General Medical Sciences, NIH to WKW. The funders had no role in study design, data  
565 collection and analysis, decision to publish, or preparation of the manuscript.

566

567 **REFERENCES**

568

- 569 1. Peirson TC, Diamond MS. 2013. Flaviviruses. Fields Virology, 6th ed. Lippincott  
570 Williams & Wilkins, Philadelphia.
- 571 2. Bhatt S, Gething PW, Brady OJ, Messina JP, Farlow AW, Moyes CL, Drake JM,  
572 Brownstein JS, Hoen AG, Sankoh O, Myers MF, George DB, Jaenisch T, Wint  
573 GR, Simmons CP, Scott TW, Farrar JJ, Hay SI. 2013. The global distribution and  
574 burden of dengue. Nature 496:504-7.

- 575 3. Faye O, Freire CC, Iamarino A, Faye O, de Oliveira JV, Diallo M, Zanotto PM,  
576 Sall AA. 2014. Molecular evolution of Zika virus during its emergence in the  
577 20(th) century. PLoS Negl Trop Dis 8:e2636.
- 578 4. Simpson DI. 1964. Zika Virus Infection in Man. Trans R Soc Trop Med Hyg  
579 58:335-8.
- 580 5. Weaver SC, Costa F, Garcia-Blanco MA, Ko AI, Ribeiro GS, Saade G, Shi PY,  
581 Vasilakis N. 2016. Zika virus: History, emergence, biology, and prospects for  
582 control. Antiviral Res 130:69-80.
- 583 6. Krauer F, Riesen M, Reveiz L, Oladapo OT, Martinez-Vega R, Porgo TV,  
584 Haefliger A, Broutet NJ, Low N, Group WHOZCW. 2017. Zika Virus Infection as a  
585 Cause of Congenital Brain Abnormalities and Guillain-Barre Syndrome:  
586 Systematic Review. PLoS Med 14:e1002203.
- 587 7. World Health Organization. 2016. WHO Director-General summarizes the  
588 outcome of the Emergency Committee regarding clusters of microcephaly and  
589 Guillain-Barré syndrome.  
590 [http://www.who.int/mediacentre/news/statements/2016/emergency-committee-](http://www.who.int/mediacentre/news/statements/2016/emergency-committee-zika-microcephaly/en/)  
591 [zika-microcephaly/en/](http://www.who.int/mediacentre/news/statements/2016/emergency-committee-zika-microcephaly/en/). Accessed
- 592 8. Armstrong P, Hennessey M, Adams M, Cherry C, Chiu S, Harrist A, Kwit N,  
593 Lewis L, McGuire DO, Oduyebo T, Russell K, Talley P, Tanner M, Williams C,  
594 Zika Virus Response E, Laboratory T. 2016. Travel-Associated Zika Virus  
595 Disease Cases Among U.S. Residents--United States, January 2015-February  
596 2016. MMWR Morb Mortal Wkly Rep 65:286-9.

- 597 9. Waggoner JJ, Gresh L, Vargas MJ, Ballesteros G, Tellez Y, Soda KJ, Sahoo MK,  
598 Nunez A, Balmaseda A, Harris E, Pinsky BA. 2016. Viremia and Clinical  
599 Presentation in Nicaraguan Patients Infected With Zika Virus, Chikungunya  
600 Virus, and Dengue Virus. *Clin Infect Dis* 63:1584-1590.
- 601 10. Grifoni A, Pham J, Sidney J, O'Rourke PH, Paul S, Peters B, Martini SR, de Silva  
602 AD, Ricciardi MJ, Magnani DM, Silveira CGT, Maestri A, Costa PR, de-Oliveira-  
603 Pinto LM, de Azeredo EL, Damasco PV, Phillips E, Mallal S, de Silva AM, Collins  
604 M, Durbin A, Diehl SA, Cerpas C, Balmaseda A, Kuan G, Coloma J, Harris E,  
605 Crowe JE, Jr., Stone M, Norris PJ, Busch M, Vivanco-Cid H, Cox J, Graham BS,  
606 Ledgerwood JE, Turtle L, Solomon T, Kallas EG, Watkins DI, Weiskopf D, Sette  
607 A. 2017. Prior Dengue virus exposure shapes T cell immunity to Zika virus in  
608 humans. *J Virol* doi:10.1128/JVI.01469-17.
- 609 11. Lanciotti RS, Kosoy OL, Laven JJ, Velez JO, Lambert AJ, Johnson AJ, Stanfield  
610 SM, Duffy MR. 2008. Genetic and serologic properties of Zika virus associated  
611 with an epidemic, Yap State, Micronesia, 2007. *Emerg Infect Dis* 14:1232-9.
- 612 12. Tsai WY, Youn HH, Brites C, Tsai JJ, Tyson J, Pedroso C, Drexler JF, Stone M,  
613 Simmons G, Busch MP, Lanteri M, Stramer SL, Balmaseda A, Harris E, Wang  
614 WK. 2017. Distinguishing Secondary Dengue Virus Infection From Zika Virus  
615 Infection With Previous Dengue by a Combination of 3 Simple Serological Tests.  
616 *Clin Infect Dis* 65:1829-1836.
- 617 13. Lai CY, Tsai WY, Lin SR, Kao CL, Hu HP, King CC, Wu HC, Chang GJ, Wang  
618 WK. 2008. Antibodies to envelope glycoprotein of dengue virus during the natural  
619 course of infection are predominantly cross-reactive and recognize epitopes

- 620 containing highly conserved residues at the fusion loop of domain II. *J Virol*  
621 82:6631-43.
- 622 14. Johnson BW, Kosoy O, Martin DA, Noga AJ, Russell BJ, Johnson AA, Petersen  
623 LR. 2005. West Nile virus infection and serologic response among persons  
624 previously vaccinated against yellow fever and Japanese encephalitis viruses.  
625 *Vector Borne Zoonotic Dis* 5:137-45.
- 626 15. Rabe IB, Staples JE, Villanueva J, Hummel KB, Johnson JA, Rose L, Mts, Hills  
627 S, Wasley A, Fischer M, Powers AM. 2016. Interim Guidance for Interpretation of  
628 Zika Virus Antibody Test Results. *MMWR Morb Mortal Wkly Rep* 65:543-6.
- 629 16. Centers for Disease Control and Prevention. Guidance for U.S. laboratories  
630 testing for Zika virus infection. Available at:  
631 <http://www.cdc.gov/zika/laboratories/lab-guidance.html>. Accessed 14 February  
632 2018.
- 633 17. Dejnirattisai W, Supasa P, Wongwiwat W, Rouvinski A, Barba-Spaeth G,  
634 Duangchinda T, Sakuntabhai A, Cao-Lormeau VM, Malasit P, Rey FA,  
635 Mongkolsapaya J, Screaton GR. 2016. Dengue virus sero-cross-reactivity drives  
636 antibody-dependent enhancement of infection with zika virus. *Nat Immunol*  
637 17:1102-8.
- 638 18. Priyamvada L, Quicke KM, Hudson WH, Onlamoon N, Sewatanon J, Edupuganti  
639 S, Pattanapanyasat K, Chokephaibulkit K, Mulligan MJ, Wilson PC, Ahmed R,  
640 Suthar MS, Wrammert J. 2016. Human antibody responses after dengue virus  
641 infection are highly cross-reactive to Zika virus. *Proc Natl Acad Sci U S A*  
642 113:7852-7.

- 643 19. Castanha PM, Braga C, Cordeiro MT, Souza AI, Silva CD, Jr., Martelli CM, van  
644 Panhuis WG, Nascimento EJ, Marques ET. 2016. Placental Transfer of Dengue  
645 Virus (DENV)-Specific Antibodies and Kinetics of DENV Infection-Enhancing  
646 Activity in Brazilian Infants. *J Infect Dis* 214:265-72.
- 647 20. Stettler K, Beltramello M, Espinosa DA, Graham V, Cassotta A, Bianchi S,  
648 Vanzetta F, Minola A, Jaconi S, Mele F, Foglierini M, Pedotti M, Simonelli L,  
649 Dowall S, Atkinson B, Percivalle E, Simmons CP, Varani L, Blum J, Baldanti F,  
650 Cameroni E, Hewson R, Harris E, Lanzavecchia A, Sallusto F, Corti D. 2016.  
651 Specificity, cross-reactivity, and function of antibodies elicited by Zika virus  
652 infection. *Science* 353:823-6.
- 653 21. Halstead SB, O'Rourke EJ. 1977. Antibody-enhanced dengue virus infection in  
654 primate leukocytes. *Nature* 265:739-41.
- 655 22. Bardina SV, Bunduc P, Tripathi S, Duehr J, Frere JJ, Brown JA, Nachbagauer R,  
656 Foster GA, Kryzstof D, Tortorella D, Stramer SL, Garcia-Sastre A, Krammer F,  
657 Lim JK. 2017. Enhancement of Zika virus pathogenesis by preexisting  
658 antinflavivirus immunity. *Science* 356:175-180.
- 659 23. Steinhagen K, Probst C, Radzimski C, Schmidt-Chanasit J, Emmerich P, van  
660 Esbroeck M, Schinkel J, Grobusch MP, Goorhuis A, Warnecke JM, Lattwein E,  
661 Komorowski L, Deerberg A, Saschenbrecker S, Stocker W, Schlumberger W.  
662 2016. Serodiagnosis of Zika virus (ZIKV) infections by a novel NS1-based ELISA  
663 devoid of cross-reactivity with dengue virus antibodies: a multicohort study of  
664 assay performance, 2015 to 2016. *Euro Surveill* 21.

- 665 24. Balmaseda A, Stettler K, Medialdea-Carrera R, Collado D, Jin X, Zambrana JV,  
666 Jaconi S, Cameroni E, Saborio S, Rovida F, Percivalle E, Ijaz S, Dicks S, Ushiro-  
667 Lumb I, Barzon L, Siqueira P, Brown DWG, Baldanti F, Tedder R, Zambon M, de  
668 Filippis AMB, Harris E, Corti D. 2017. Antibody-based assay discriminates Zika  
669 virus infection from other flaviviruses. *Proc Natl Acad Sci U S A* 114:8384-8389.
- 670 25. Wen J, Tang WW, Sheets N, Ellison J, Sette A, Kim K, Shresta S. 2017.  
671 Identification of Zika virus epitopes reveals immunodominant and protective roles  
672 for dengue virus cross-reactive CD8(+) T cells. *Nat Microbiol* 2:17036.
- 673 26. Weiskopf D, Angelo MA, de Azeredo EL, Sidney J, Greenbaum JA, Fernando  
674 AN, Broadwater A, Kolla RV, De Silva AD, de Silva AM, Mattia KA, Doranz BJ,  
675 Grey HM, Shresta S, Peters B, Sette A. 2013. Comprehensive analysis of  
676 dengue virus-specific responses supports an HLA-linked protective role for CD8+  
677 T cells. *Proc Natl Acad Sci U S A* 110:E2046-53.
- 678 27. Herrera BB, Tsai WY, Chang CA, Hamel DJ, Wang WK, Lu Y, Mboup S, Kanki  
679 PJ. 2018. Sustained specific and cross-reactive T cell responses to Zika and  
680 Dengue viruses NS3 in West Africa. *J Virol* doi:10.1128/JVI.01992-17.
- 681 28. Netto EM, Moreira-Soto A, Pedroso C, Hoser C, Funk S, Kucharski AJ,  
682 Rockstroh A, Kummerer BM, Sampaio GS, Luz E, Vaz SN, Dias JP, Bastos FA,  
683 Cabral R, Kistemann T, Ulbert S, de Lamballerie X, Jaenisch T, Brady OJ,  
684 Drosten C, Sarno M, Brites C, Drexler JF. 2017. High Zika Virus Seroprevalence  
685 in Salvador, Northeastern Brazil Limits the Potential for Further Outbreaks. *MBio*  
686 8.
- 687 29. Halstead SB. 2007. Dengue. *Lancet* 370:1644-52.

- 688 30. Guzman MG, Alvarez M, Halstead SB. 2013. Secondary infection as a risk factor  
689 for dengue hemorrhagic fever/dengue shock syndrome: an historical perspective  
690 and role of antibody-dependent enhancement of infection. *Arch Virol* 158:1445-  
691 59.
- 692 31. Halstead SB, Rojanasuphot S, Sangkawibha N. 1983. Original antigenic sin in  
693 dengue. *Am J Trop Med Hyg* 32:154-6.
- 694 32. Mongkolsapaya J, Dejnirattisai W, Xu XN, Vasanawathana S,  
695 Tangthawornchaikul N, Chairunsri A, Sawasdivorn S, Duangchinda T, Dong T,  
696 Rowland-Jones S, Yenchitsomanus PT, McMichael A, Malasit P, Screaton G.  
697 2003. Original antigenic sin and apoptosis in the pathogenesis of dengue  
698 hemorrhagic fever. *Nat Med* 9:921-7.
- 699 33. Karlsson RK, Jennes W, Page-Shafer K, Nixon DF, Shacklett BL. 2004. Poorly  
700 soluble peptides can mimic authentic ELISPOT responses. *J Immunol Methods*  
701 285:89-92.
- 702 34. Madden DR. 1995. The three-dimensional structure of peptide-MHC complexes.  
703 *Annu Rev Immunol* 13:587-622.
- 704 35. Stryhn A, Pedersen LO, Holm A, Buus S. 2000. Longer peptide can be  
705 accommodated in the MHC class I binding site by a protrusion mechanism. *Eur J*  
706 *Immunol* 30:3089-99.
- 707 36. Horig H, Young AC, Papadopoulos NJ, DiLorenzo TP, Nathenson SG. 1999.  
708 Binding of longer peptides to the H-2Kb heterodimer is restricted to peptides  
709 extended at their C terminus: refinement of the inherent MHC class I peptide  
710 binding criteria. *J Immunol* 163:4434-41.

- 711 37. Cao H, Agrawal D, Kushner N, Touzjian N, Essex M, Lu Y. 2002. Delivery of  
712 exogenous protein antigens to major histocompatibility complex class I pathway  
713 in cytosol. *J Infect Dis* 185:244-51.
- 714 38. Kushner N, Zhang D, Touzjian N, Essex M, Lieberman J, Lu Y. 2003. A fragment  
715 of anthrax lethal factor delivers proteins to the cytosol without requiring protective  
716 antigen. *Proc Natl Acad Sci U S A* 100:6652-7.
- 717 39. Lu Y, Friedman R, Kushner N, Doling A, Thomas L, Touzjian N, Starnbach M,  
718 Lieberman J. 2000. Genetically modified anthrax lethal toxin safely delivers  
719 whole HIV protein antigens into the cytosol to induce T cell immunity. *Proc Natl*  
720 *Acad Sci U S A* 97:8027-32.
- 721 40. McEvers K, Elrefaei M, Norris P, Deeks S, Martin J, Lu Y, Cao H. 2005. Modified  
722 anthrax fusion proteins deliver HIV antigens through MHC Class I and II  
723 pathways. *Vaccine* 23:4128-35.
- 724 41. Sarr AD, Lu Y, Sankale JL, Eisen G, Popper S, Mboup S, Kanki PJ, Cao H.  
725 2001. Robust HIV type 2 cellular immune response measured by a modified  
726 anthrax toxin-based enzyme-linked immunospot assay. *AIDS Res Hum*  
727 *Retroviruses* 17:1257-64.
- 728 42. Liao Q, Strong AJ, Liu Y, Liu Y, Meng P, Fu Y, Touzjian N, Shao Y, Zhao Z, Lu  
729 Y. 2012. HIV vaccine candidates generate in vitro T cell response to putative  
730 epitopes in Chinese-origin rhesus macaques. *Vaccine* 30:1601-8.
- 731 43. Herrera BB, Chang CA, Hamel DJ, Mboup S, Ndiaye D, Imade G, Okpokwu J,  
732 Agbaji O, Bei AK, Kanki PJ. 2017. Continued Transmission of Zika Virus in  
733 Humans in West Africa, 1992-2016. *J Infect Dis* 215:1546-1550.



- 734 44. Watt G, Kantipong P, Jongsakul K. 2003. Decrease in human immunodeficiency  
735 virus type 1 load during acute dengue fever. *Clin Infect Dis* 36:1067-9.
- 736 45. McLinden JH, Stapleton JT, Chang Q, Xiang J. 2008. Expression of the dengue  
737 virus type 2 NS5 protein in a CD4(+) T cell line inhibits HIV replication. *J Infect*  
738 *Dis* 198:860-3.
- 739 46. Tsai WY, Lai CY, Wu YC, Lin HE, Edwards C, Jumnainsong A, Kliks S, Halstead  
740 S, Mongkolsapaya J, Screaton GR, Wang WK. 2013. High-avidity and potently  
741 neutralizing cross-reactive human monoclonal antibodies derived from secondary  
742 dengue virus infection. *J Virol* 87:12562-75.
- 743 47. Moreira-Soto A, Sarno M, Pedroso C, Netto EM, Rockstroh A, Luz E, Feldmann  
744 M, Fischer C, Bastos FA, Kummerer BM, de Lamballerie X, Drosten C, Ulbert S,  
745 Brites C, Drexler JF. 2017. Evidence for Congenital Zika Virus Infection From  
746 Neutralizing Antibody Titers in Maternal Sera, Northeastern Brazil. *J Infect Dis*  
747 216:1501-1504.
- 748 48. Govindarajan D, Meschino S, Guan L, Clements DE, ter Meulen JH, Casimiro  
749 DR, Coller BA, Bett AJ. 2015. Preclinical development of a dengue tetravalent  
750 recombinant subunit vaccine: Immunogenicity and protective efficacy in  
751 nonhuman primates. *Vaccine* 33:4105-16.
- 752
- 753
- 754
- 755
- 756

757 TABLES

758 Table 1 Results of Serological tests

| ID     | Acute-phase sera          |                         |                        | Late convalescent-phase serum |                           |                        |                         |                         |                                              | Interpretation |
|--------|---------------------------|-------------------------|------------------------|-------------------------------|---------------------------|------------------------|-------------------------|-------------------------|----------------------------------------------|----------------|
|        | ZIKV-NS1 IgG <sup>a</sup> | DENV-E IgG <sup>a</sup> | PRNT test <sup>b</sup> | ZIKV-NS1 IgG <sup>c</sup>     | DENV-NS1 IgG <sup>c</sup> | rOD ratio <sup>c</sup> | ZIKV-E IgG <sup>d</sup> | DENV-E IgG <sup>d</sup> | NT test <sup>f</sup><br>D1/D2/D3<br>/D4/ZIKV |                |
| ZK0978 | -                         | -                       | -                      | -                             | -                         | NA                     | -                       | -                       | <10/<10/<10/<10/<10                          | negative       |
| ZK0982 | -                         | -                       | -                      | -                             | -                         | NA                     | -                       | -                       | <10/<10/<10/<10/<10                          | negative       |
| ZK0987 | -                         | -                       | -                      | -                             | -                         | NA                     | -                       | -                       | <10/<10/<10/<10/<10                          | negative       |
| ZK0999 | -                         | -                       | -                      | -                             | -                         | NA                     | -                       | -                       | <10/<10/<10/<10/<10                          | negative       |
| ZK0979 | +                         | +                       |                        | +                             | -                         | NA                     | + <sup>e</sup>          | +                       | <10/<10/<10/<10/>160                         | pZIKV          |
| ZK0993 | +                         | +                       |                        | +                             | -                         | NA                     | + <sup>e</sup>          | +                       | <40/<40/<10/<10/>160                         | pZIKV          |
| ZK0998 | +                         | +                       |                        | +                             | -                         | NA                     | + <sup>e</sup>          | +                       | <10/<10/<40/<10/>160                         | pZIKV          |
| ZK1006 | +                         | +                       |                        | +                             | -                         | NA                     | + <sup>e</sup>          | +                       | <80/<40/<10/<40/640                          | pZIKV          |
| ZK0996 | +                         | -                       | +                      | +                             | -                         | NA                     | + <sup>e</sup>          | +                       | <10/<10/<10/<10/>160                         | pZIKV          |
| ZK0966 | -                         | +                       | -                      | -                             | -                         | NA                     | +                       | + <sup>e</sup>          | <40/160/<10/<40/<10                          | pDENV          |
| ZK0980 | -                         | +                       |                        | -                             | -                         | NA                     | +                       | + <sup>e</sup>          | <40/<40/>160/<40/<10                         | pDENV          |
| ZK0995 | -                         | +                       |                        | -                             | -                         | NA                     | +                       | + <sup>e</sup>          | >640/160/<10/<10/<10                         | pDENV          |
| ZK0997 | ND                        | ND                      |                        | -                             | -                         | NA                     | +                       | + <sup>e</sup>          | <40/>160/<40/<40/<10                         | pDENV          |
| ZK0972 | +                         | +                       |                        | +                             | +                         | ≥0.24                  | +                       | +                       | >40/ND/ND/ND/>80                             | ZIKVwpDENV     |
| ZK0975 | +                         | +                       |                        | +                             | +                         | ≥0.24                  | +                       | +                       | >40/ND/ND/ND/>80                             | ZIKVwpDENV     |
| ZK0989 | +                         | +                       | +                      | +                             | +                         | ≥0.24                  | +                       | +                       | >40/ND/ND/ND/>80                             | ZIKVwpDENV     |
| ZK0991 | +                         | +                       | +                      | +                             | +                         | ≥0.24                  | +                       | +                       | >40/ND/ND/ND/>80                             | ZIKVwpDENV     |
| ZK1000 | +                         | +                       |                        | +                             | +                         | ≥0.24                  | +                       | +                       | >40/ND/ND/ND/>40                             | ZIKVwpDENV     |
| ZK1009 | +                         | +                       | +                      | +                             | +                         | ≥0.24                  | +                       | +                       | >10/ND/ND/ND/>80                             | ZIKVwpDENV     |
| ZK1011 | +                         | +                       |                        | +                             | +                         | ≥0.24                  | +                       | +                       | >40/ND/ND/ND/>80                             | ZIKVwpDENV     |
| ZK1012 | +                         | +                       | +                      | +                             | +                         | ≥0.24                  | +                       | +                       | >40/ND/ND/ND/>80                             | ZIKVwpDENV     |
| ZK1014 | +                         | +                       | +                      | +                             | +                         | ≥0.24                  | +                       | +                       | >40/ND/ND/ND/>80                             | ZIKVwpDENV     |
| ZK1015 | +                         | +                       | +                      | +                             | +                         | ≥0.24                  | +                       | +                       | >40/ND/ND/ND/>80                             | ZIKVwpDENV     |
| ZK0968 | +                         | ND                      |                        | +                             | +                         | ≥0.24                  | +                       | +                       | >40/ND/ND/ND/>80                             | ZIKVwpDENV     |
| ZK0984 | +                         | +                       |                        | +                             | +                         | ≥0.24                  | +                       | +                       | >320/>1280/<80/>1280/>320                    | ZIKVwpDENV     |
| ZK0976 | -                         | +                       |                        | +                             | +                         | <0.24                  | +                       | +                       | >40/ND/ND/ND/<10                             | sDENV          |
| ZK0986 | -                         | +                       |                        | +                             | +                         | <0.24                  | +                       | +                       | >40/ND/ND/ND/>80                             | sDENV          |

|        |   |    |   |   |   |       |   |   |                        |         |
|--------|---|----|---|---|---|-------|---|---|------------------------|---------|
| ZK0967 | + | +  |   | + | + | <0.24 | + | + | >40/ND/ND/ND/>80       | sDENV   |
| ZK0969 | + | +  |   | + | + | <0.24 | + | + | >40/ND/ND/ND/>40       | sDENV   |
| ZK0971 | + | +  |   | + | + | <0.24 | + | + | >40/>40/ND/ND/<10      | sDENV   |
| ZK0977 | + | +  |   | + | + | <0.24 | + | + | >40/ND/ND/ND/>80       | sDENV   |
| ZK0983 | + | +  | + | + | + | <0.24 | + | + | >40/ND/ND/ND/>10       | sDENV   |
| ZL0985 | + | +  | + | + | + | <0.24 | + | + | >40/ND/ND/ND/>40       | sDENV   |
| ZK0988 | + | +  |   | + | + | <0.24 | + | + | >40/ND/ND/ND/>40       | sDENV   |
| ZK0992 | + | +  | + | + | + | <0.24 | + | + | >40/ND/ND/ND/>80       | sDENV   |
| ZK0994 | + | +  | - | + | + | <0.24 | + | + | >40/ND/ND/ND/>40       | sDENV   |
| ZK1001 | + | +  |   | + | + | <0.24 | + | + | >40/>40/ND/ND/<10      | sDENV   |
| ZK1010 | + | +  |   | + | + | <0.24 | + | + | >40/ND/ND/ND/>80       | sDENV   |
| ZK1013 | + | ND |   | + | + | <0.24 | + | + | >40/ND/ND/ND/>10       | sDENV   |
| ZK0973 | - | ND |   | - | + | <0.24 | + | + | >40/<80/>80/ND/>320    | sDENV   |
| ZK0974 | - | +  |   | - | + | <0.24 | + | + | >40/>320/>80/ND/>10    | sDENV   |
| ZK1002 | - | +  | - | - | + | <0.24 | + | + | >40/>80/<80/ND/<10     | sDENV   |
| ZK1003 | - | +  | - | - | + | <0.24 | + | + | >40/>80/<80/ND/<10     | sDENV   |
| ZK1007 | - | +  |   | - | + | <0.24 | + | + | >40/>80/>80/ND/<10     | sDENV   |
| ZK1016 | - | +  |   | - | + | <0.24 | + | + | >40/>1280/>1280/ND/>10 | sDENV   |
| ZK0990 | - | +  | - | - | + | <0.24 | + | + | >40/>1280/>80/ND/<10   | sDENV   |
| ZK1004 | + | +  |   | - | + | NA    | + | + | ND/ND/ND/ND/ND         | unknown |
| ZK1005 | + | ND |   | - | + | NA    | + | + | ND/ND/ND/ND/ND         | unknown |
| ZK1008 | + | +  |   | - | - | NA    | + | + | ND/ND/ND/ND/ND         | unknown |
| ZK0981 | - | ND |   | - | - | NA    | - | - | ND/ND/ND/ND/ND         | unknown |

759

760 pZIKV: primary ZIKV infection; pDENV: primary DENV infection; sDENV: secondary DENV infection; ZIKVwpDENV: ZIKV infection

761 with previous DENV infection. ND: not determined; NA not applicable.

762 <sup>a</sup>Euroimmun ZIKV-NS1 and DENV-E IgG ELISAs were performed on acute-phase sera (28).

763 <sup>b</sup>PRNT was performed on acute-phase sera to detect neutralization antibody to ZIKV (47).

764 <sup>c</sup>ZIKV-NS1 and DENV-NS IgG ELISAs were described previously (12). The rOD ratio (ZIKV-NS1/DENV-NS1) < or ≥0.24 was  
765 classified as sDENV or ZIKVwpDENV (12).

766 <sup>d</sup>eZIKV-E and DENV-E IgG ELISAs utilized ZIKV VLP and DENV virions, respectively (46). ΔrOD (rOD of ZIKV–rOD of DENV) ≥  
767 0.17 or < –0.17 was classified as pZIKV or pDENV infection, respectively.

768 <sup>f</sup>Mico-neutralization test (NT) were performed (with NT<sub>90</sub> titers shown) to confirm none, pZIKV or pDENV infection (46, 48).

769

770 **Table 2** Numerical values of ROC analysis and sensitivity and specificity results

771

772

773

774

775

776

777

|                                                                     | IFN- $\gamma$ <sup>+</sup><br>DENV vs. ZIKV | TNF- $\alpha$ <sup>+</sup><br>DENV vs. ZIKV |
|---------------------------------------------------------------------|---------------------------------------------|---------------------------------------------|
| AUC <sup>a</sup>                                                    | 0.96                                        | 0.97                                        |
| 95% CI <sup>b</sup>                                                 | 0.91-1.02                                   | 0.92-1.01                                   |
| Cutoff                                                              | 1.055                                       | 1.048                                       |
| Sensitivity                                                         | 94%                                         | 94%                                         |
| Specificity                                                         | 92%                                         | 92%                                         |
| <sup>a</sup> Area under the curve, <sup>b</sup> Confidence interval |                                             |                                             |

778

779

780

**Table 3** Sequence homology of DENV and Asian ZIKV NS3<sup>a</sup>

781

782

783

784

785

786

787

| Serotype                                                                                                                                                                          | % homology to ZIKV |              |             |
|-----------------------------------------------------------------------------------------------------------------------------------------------------------------------------------|--------------------|--------------|-------------|
|                                                                                                                                                                                   | NS3 protease       | NS3 helicase | Full-length |
| DENV1                                                                                                                                                                             | 55%                | 71%          | 66%         |
| DENV2                                                                                                                                                                             | 58%                | 72%          | 67%         |
| DENV3                                                                                                                                                                             | 58%                | 72%          | 67%         |
| DENV4                                                                                                                                                                             | 59%                | 71%          | 67%         |
| <sup>a</sup> Homology analysis between Asian ZIKV (GenBank accession number: NC_035889.1) and DENV1 (ACO06157.1), DENV2 (JN819419.1), DENV3 (ACY70771.1), and DENV4 (AEW50183.1). |                    |              |             |

788

789

790

791

792

793

794 **Figure 1. ZIKV and DENV NS1-based and E-based IgG ELISAs.** (A) ZIKV-NS1, (B)  
795 DENV-NS1 IgG ELISAs and (C) rOD ratio. (D) ZIKV-E, (E) DENV-E and (F)  $\Delta$ rOD=rOD  
796 of ZIKV–rOD of DENV. Dots lines indicate cut-off values, 0.24 for rOD ratio and 0.17 for  
797  $\Delta$ rOD. pZIKV: primary ZIKV infection; pDENV: primary DENV infection; sDENV:  
798 secondary DENV infection; ZIKVwpDENV: ZIKV infection with previous DENV infection.  
799 NA not applicable.

800

801 **Figure 2. T cell responses to NS3 protease and helicase and ROC analysis of the**  
802 **ELISPOT test.** Late convalescent-phase PBMCs from DENV- and/or ZIKV-infected  
803 individuals were treated with homologous and heterologous LFn-DENV and -ZIKV NS3  
804 protease and the specific IFN- $\gamma$  and TNF- $\alpha$  T cell responses were detected by *ex vivo*  
805 ELISPOTs. (A) Scatter plot of the ratios of ZIKV NS3 protease to DENV NS3 protease  
806 IFN- $\gamma$  responses versus ratios of helicase. (B) ROC analysis for the IFN- $\gamma$  ELISPOT. (C)  
807 Scatter plot of the ratios of ZIKV NS3 protease to DENV NS3 protease TNF- $\alpha$  T cell  
808 responses versus ratios of helicase. (D) ROC analysis for the TNF- $\alpha$  ELISPOT. The  
809 dashed line on (A) represents the optimal cutoff value of 1.05 and the dashed line on  
810 (C) represents the optimal cutoff value of 1.048. Individual colored dots represent  
811 serologically-validated DENV- and/or ZIKV-infected individuals and the undetermined  
812 cases.

813

814 **Figure 3. T cell responses to ZIKV and/or DENV structural or nonstructural**  
815 **proteins among subgroups with different DENV and ZIKV serostatus.** Late  
816 convalescent-phase PBMCs from DENV- and/or ZIKV-infected individuals were treated

817 with homologous and/or heterologous LFn-DENV and -ZIKV capsid (ZV C),  
818 premembrane (ZV prM), NS3 protease (DV or ZV NS3-P) and NS3 helicase (DV or ZV  
819 NS3-H) and the specific IFN- $\gamma$  and TNF- $\alpha$  T cell responses were detected by *ex vivo*  
820 ELISPOTs. IFN- $\gamma$  and TNF- $\alpha$  spot forming cells (SFC) were detected, counted, and  
821 expressed as box plots with mean and standard deviations. Comparison of late  
822 convalescent-phase (A) IFN- $\gamma$  and (B) TNF- $\alpha$  T cell responses between individuals with  
823 pDENV and sDENV infections. Comparison of late convalescent-phase (C) IFN- $\gamma$  and  
824 (D) TNF- $\alpha$  T cell responses between individuals with pZIKV and ZIKVwpDENV  
825 infections. Individual colored plots represent serologically-validated DENV- and/or ZIKV-  
826 infected individual. \*,  $p < 0.05$ .

827

828 **Figure 4. Impact of HIV status on the T cell response.** Comparison of mean  
829 convalescent-phase IFN- $\gamma$  T cell responses expressed as bars and standard deviation  
830 between (A) HIV-negative (open black bars) and HIV-infected (shaded black bars)  
831 individuals with pDENV and sDENV infections grouped together, (B) HIV-negative  
832 (open dark grey bars) and HIV-infected (shaded dark grey bars) individuals with  
833 ZIKVwpDENV infections, and (C) HIV-negative (open light grey bars) and HIV-infected  
834 (shaded light grey bars) individuals with pZIKV infections. Comparison of mean  
835 convalescent-phase TNF- $\alpha$  T cell responses expressed as bars and standard deviation  
836 between (D) HIV-negative (open black bars) and HIV-infected (shaded black bars)  
837 individuals with pDENV and sDENV infections grouped together, (E) HIV-negative  
838 (open dark grey bars) and HIV-infected (shaded dark grey bars) individuals with

839 ZIKVwpDENV infections, and (F) HIV-negative (open light grey bars) and HIV-infected  
840 (shaded light grey bars) individuals with pZIKV infections. \*,  $p < 0.05$ .

841

842 **Figure 5. Clustal Omega generated amino acid sequence alignment of DENV**  
843 **serotypes 1 to 4 and Asian ZIKV.** The residues in yellow represent the NS3 protease  
844 domain (amino acids 1-169) and the residues in orange represent the helicase domain  
845 (amino acids 179-619). \*, single, fully conserved residue. :, conservation between  
846 groups of strongly similar properties – scoring  $> 0.5$  in the Gonnet PAM 250 matrix. .,  
847 conservation between groups of weakly similar properties – scoring  $\leq 0.5$  in the  
848 Gonnet PAM 250 matrix.

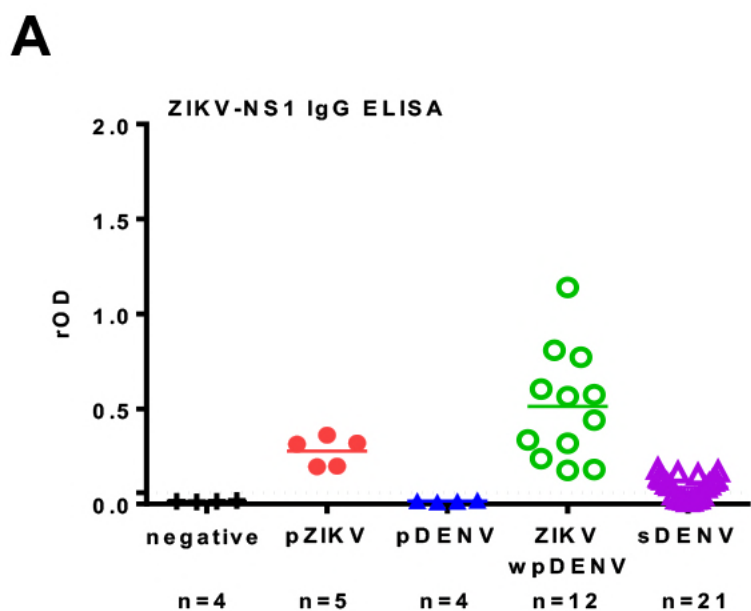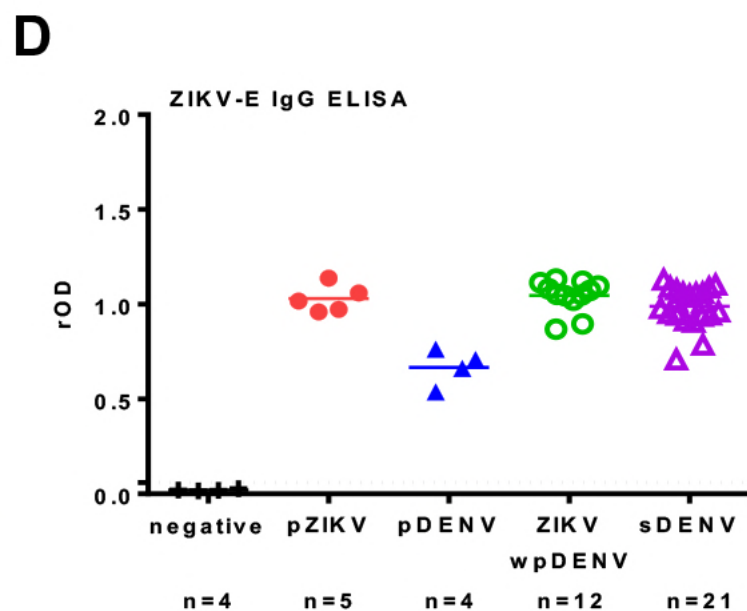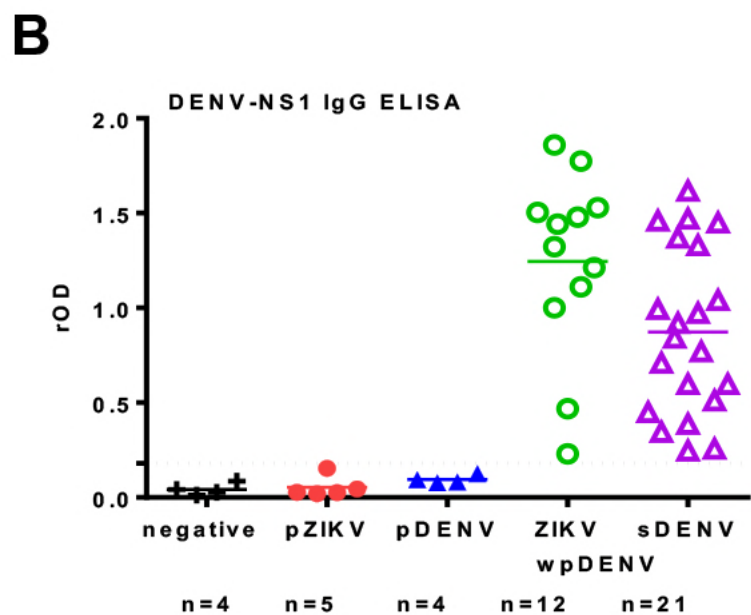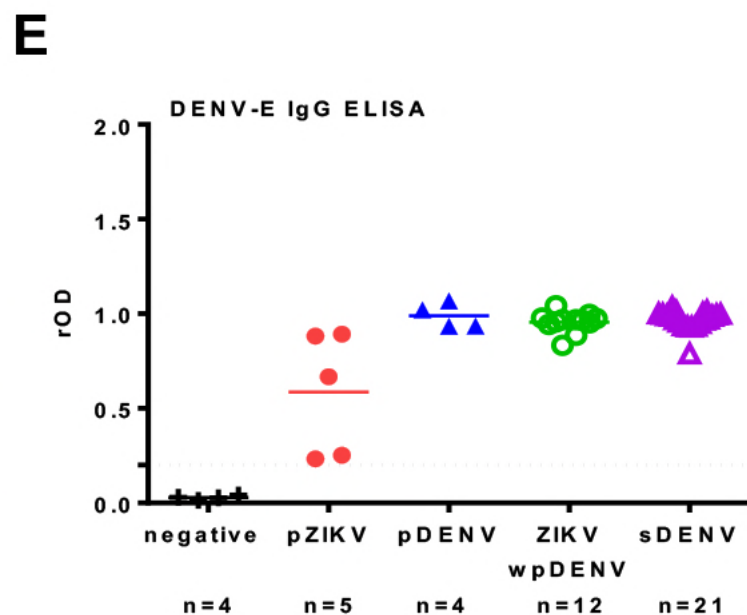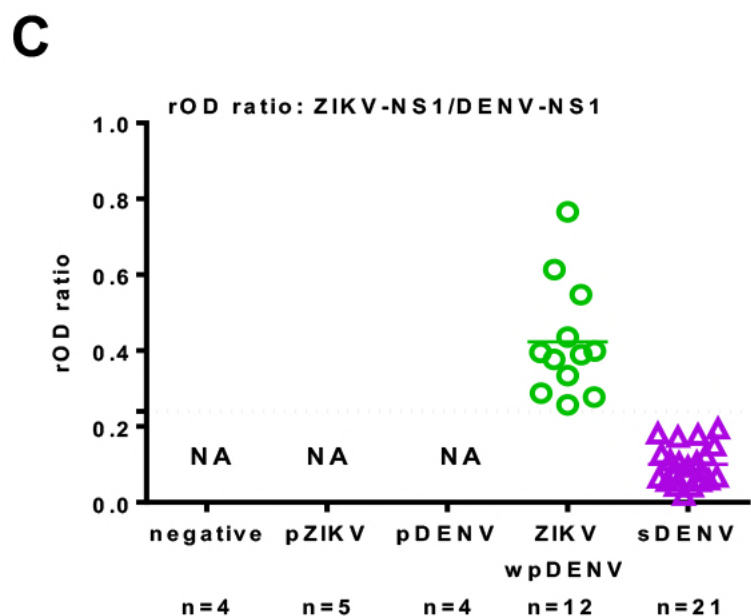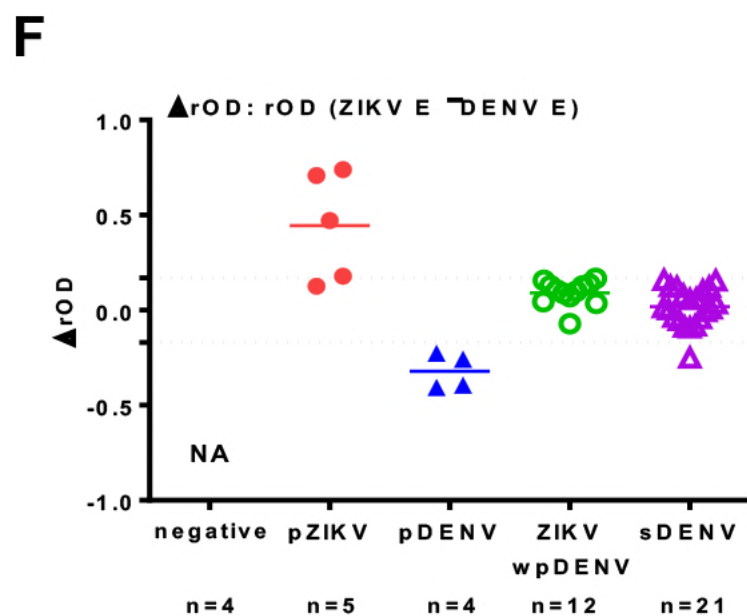



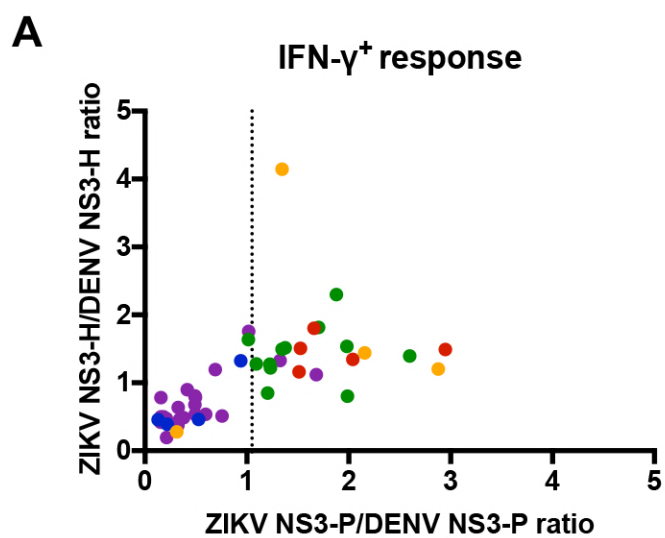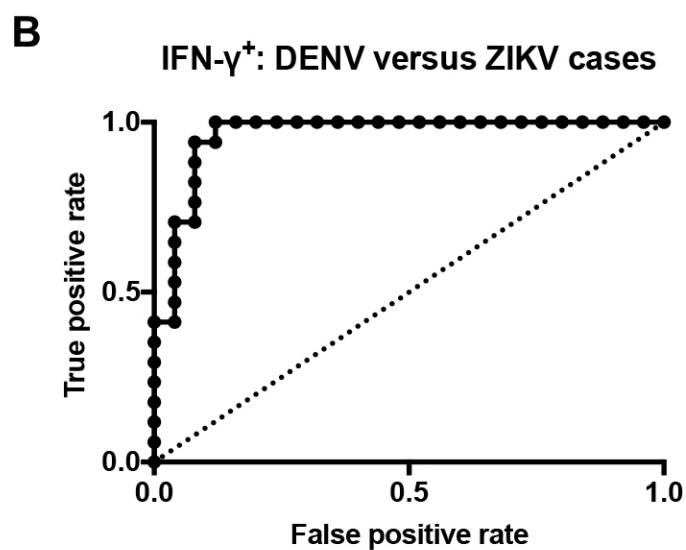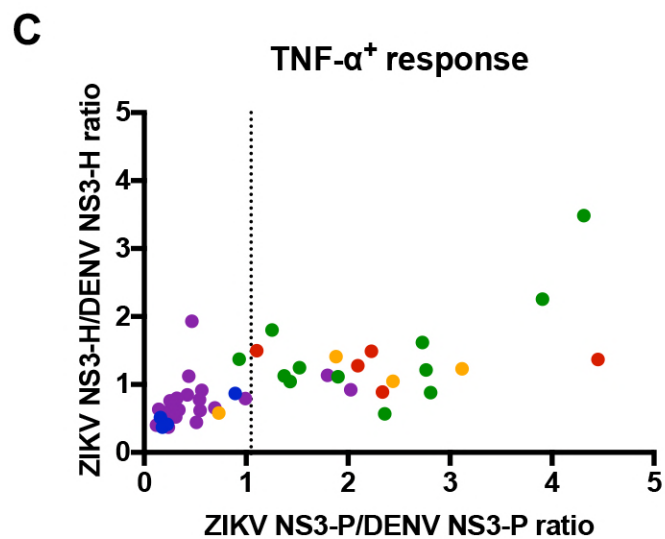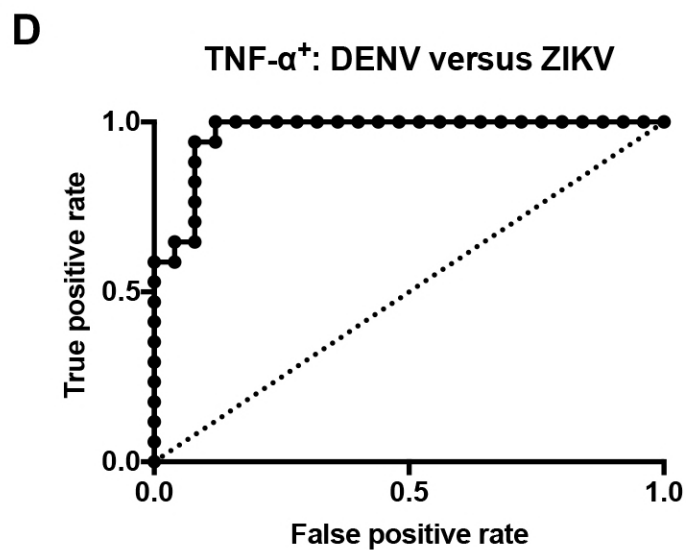

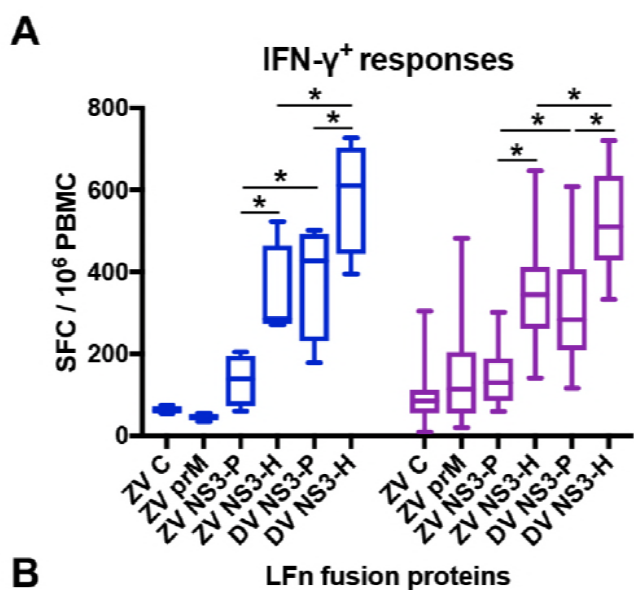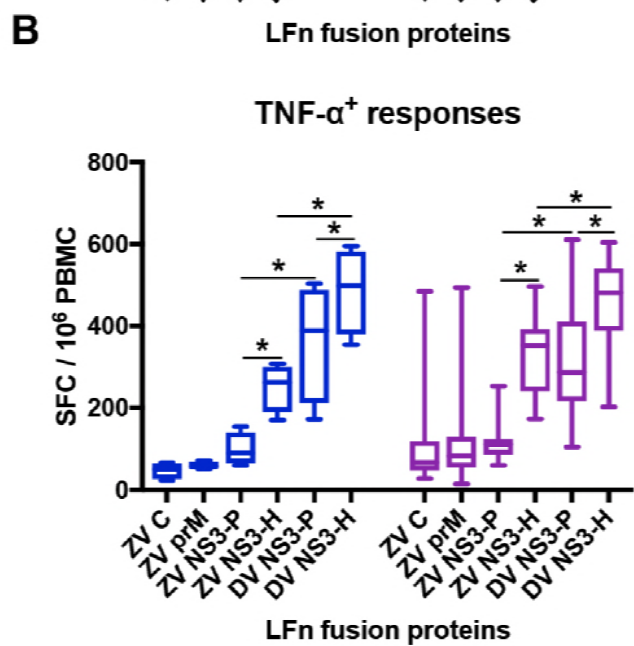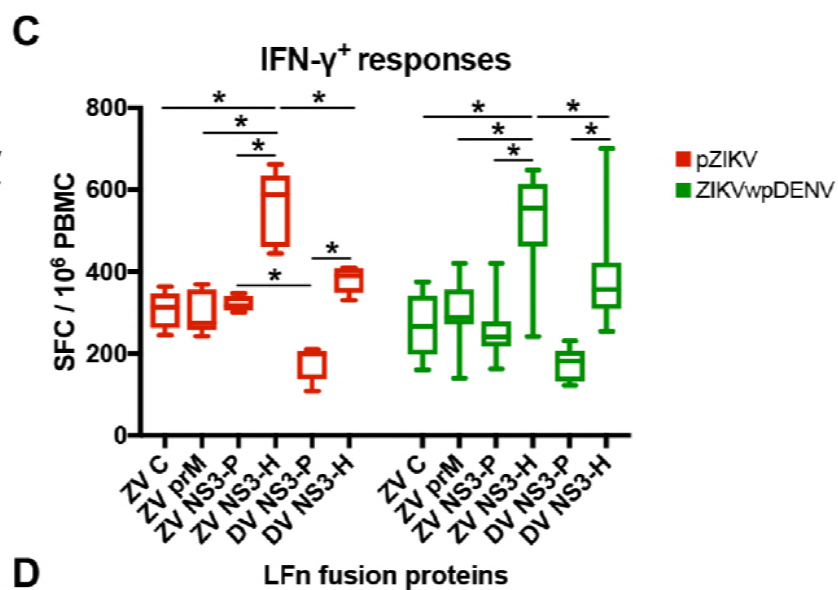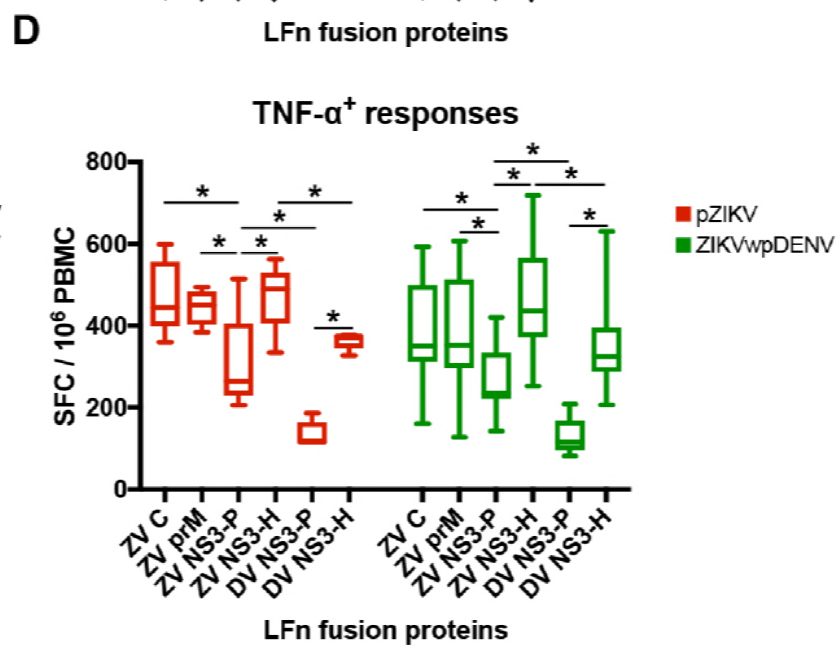

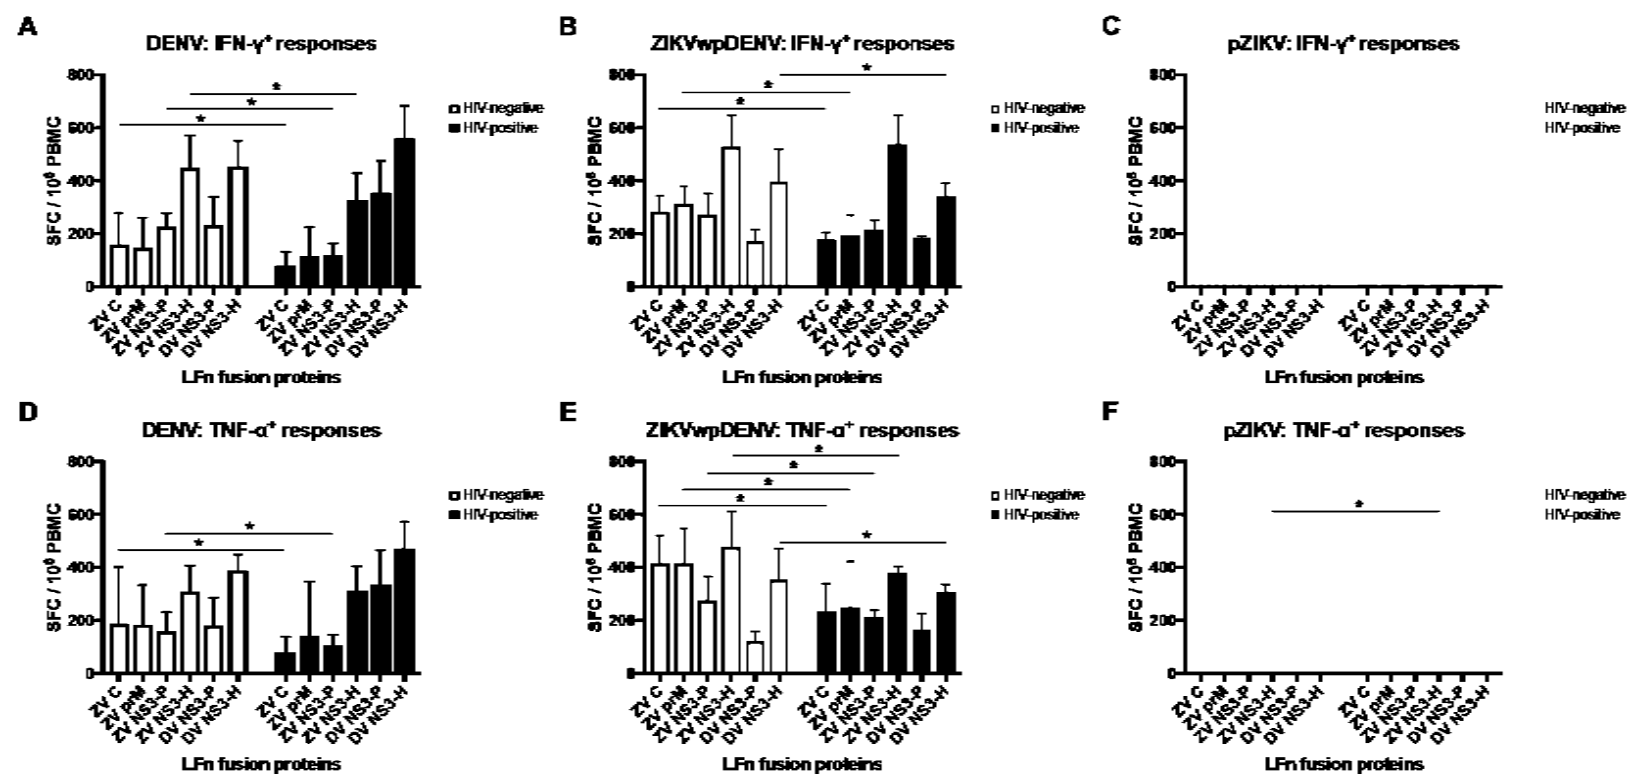

Source: http://biorxiv.org/content/10.1101/305839v1.full.pdf
